# Supplementary material for: Highly efficient copper-imprinted functionalized mesoporous organosilica nanocomposites as a recyclable catalyst for click synthesis of 1,2,3-triazole derivatives under ultrasound irradiation: multivariate study by factorial design of experiments
Source: Royal Society of Chemistry journal article supplement (doi:10.1039/c4ra17229a), 2015-01-01

## Supplementary Information

### Highly efficient copper-imprinted functionalized mesoporous organosilica nanocomposites as a new recyclable catalyst for click synthesis of 1,2,3-triazole derivatives under ultrasound irradiation: Multivariate study by factorial design of experiments

Hossein Naeimi<sup>1,\*</sup>, Vajihe Nejadshafiee<sup>1</sup> and Saeed Masoum<sup>2</sup>

<sup>1</sup>Department of Organic Chemistry, Faculty of Chemistry, University of Kashan, Kashan, 87317, I.R. Iran; Tel: 983615912388; Fax; 983615912397; Email: naeimi@kashanu.ac.ir.

<sup>2</sup>Department of Analytical Chemistry, Faculty of Chemistry, University of Kashan, Kashan, 87317, I.R. Iran.

#### Copy of <sup>1</sup>H NMR & <sup>13</sup>C NMR of the synthesized compound:

|                 |        |
|-----------------|--------|
| <b>3a</b> ..... | Page 2 |
| <b>3b</b> ..... | Page 3 |
| <b>3c</b> ..... | Page 3 |
| <b>3d</b> ..... | Page 4 |
| <b>3e</b> ..... | Page 5 |
| <b>3f</b> ..... | Page 6 |
| <b>3g</b> ..... | Page 7 |
| <b>3h</b> ..... | Page 8 |
| <b>3i</b> ..... | Page 9 |

# Copy of <sup>1</sup>H NMR & <sup>13</sup>C NMR of the synthesized compounds

2-Phenyl-2-(4-phenyl-1H-1,2,3-triazol-1-yl)ethanol (**3a**).

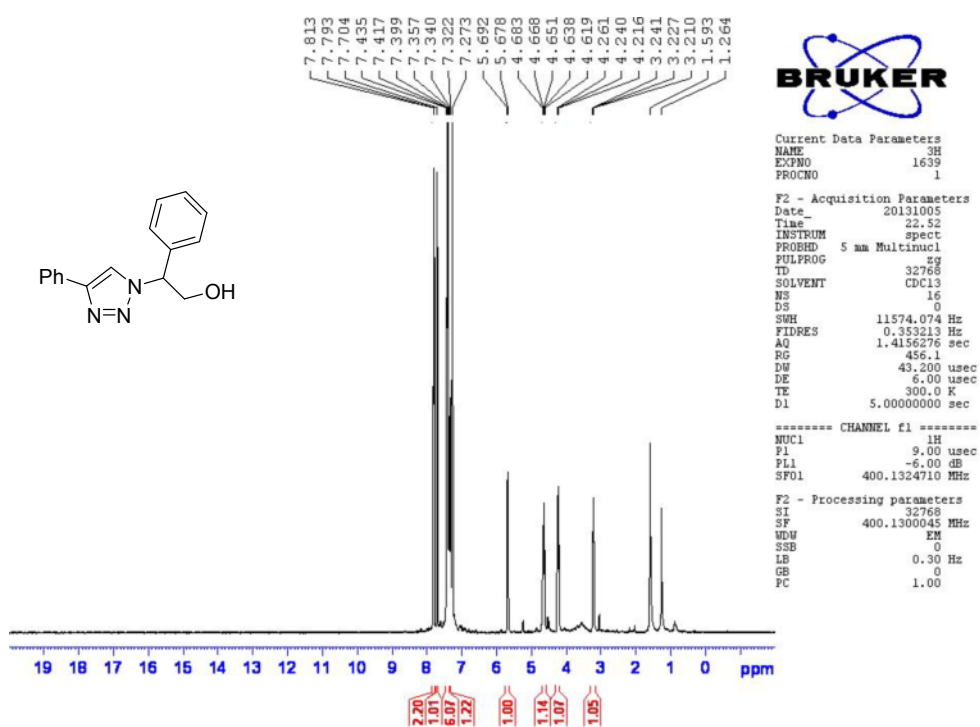

2-(4-phenyl-1H-1,2,3-triazol-1-yl)-1-p-tolyethanol (**3b**).

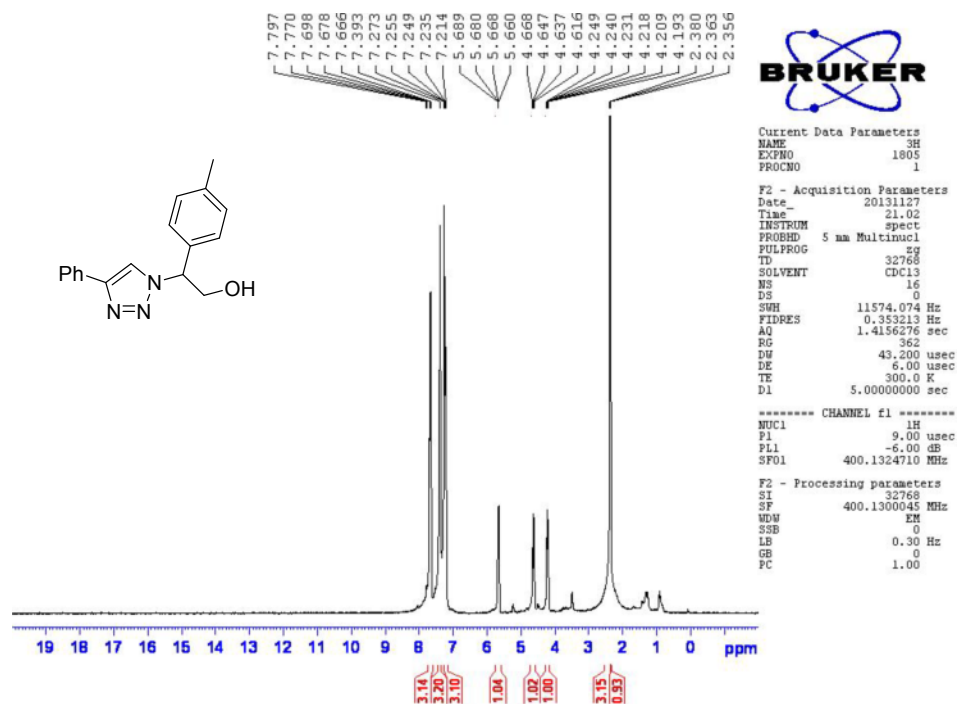

2-(4-Phenyl-1H-1,2,3-triazol-1-yl) cyclohexanol (**3c**).

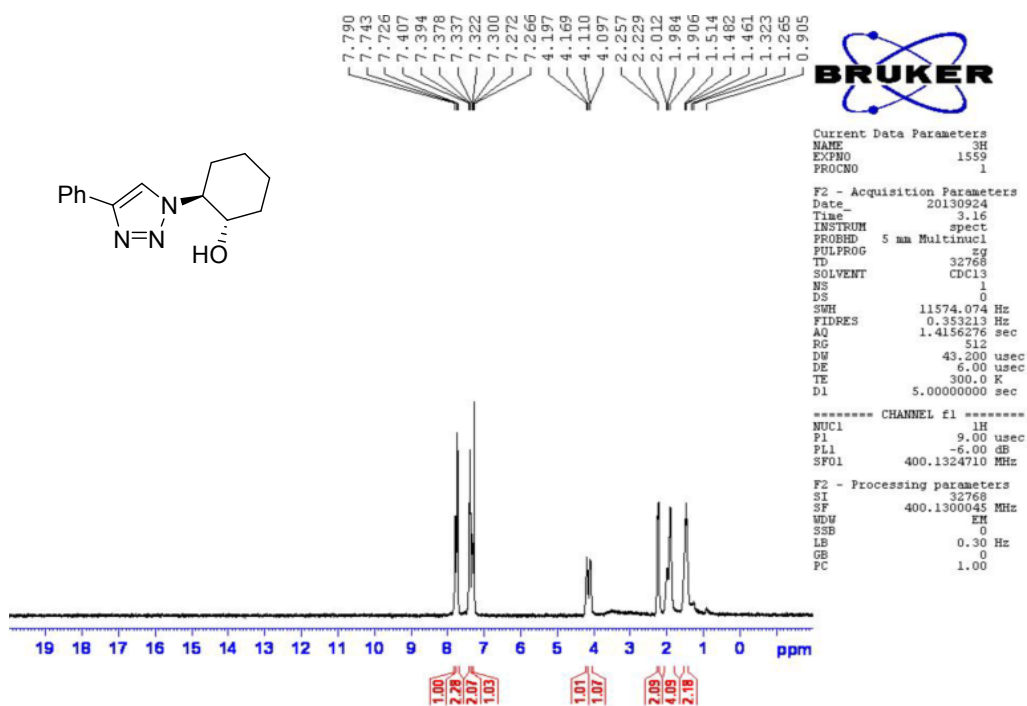

1-(4-phenyl-1H-1,2,3-triazol)hexan-2-ol (**3d**).

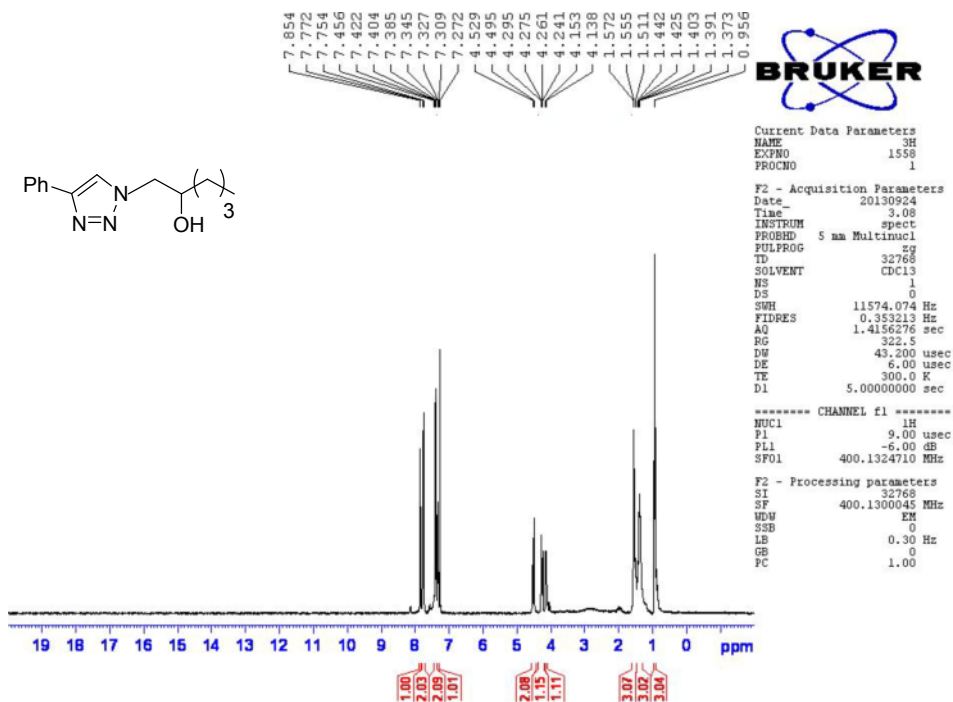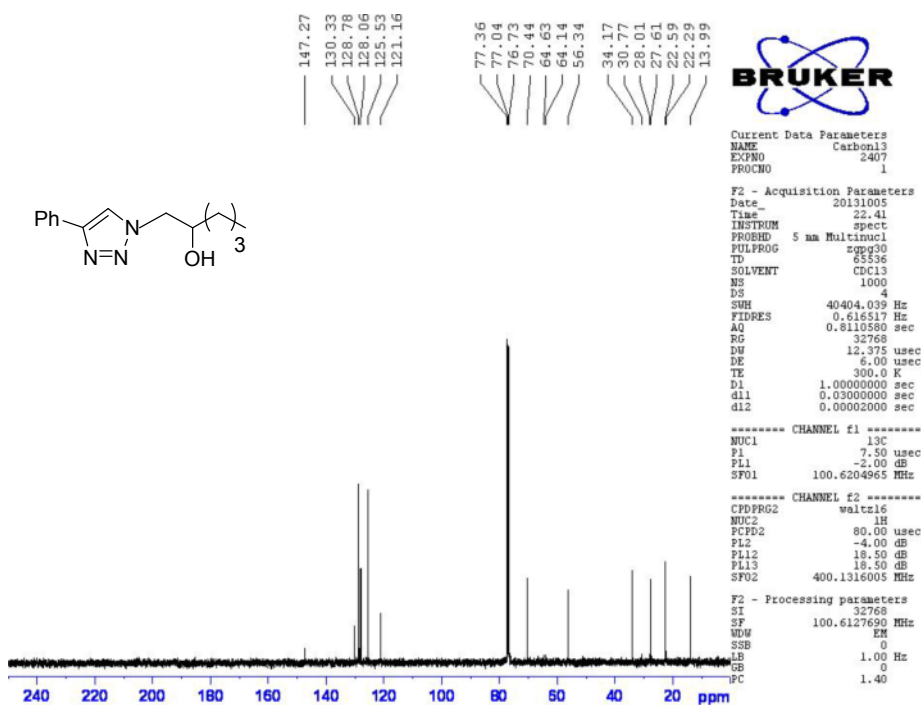

1-(4-phenyl-1H-1,2,3-triazol-1-yl)butan-2-ol (**3e**).

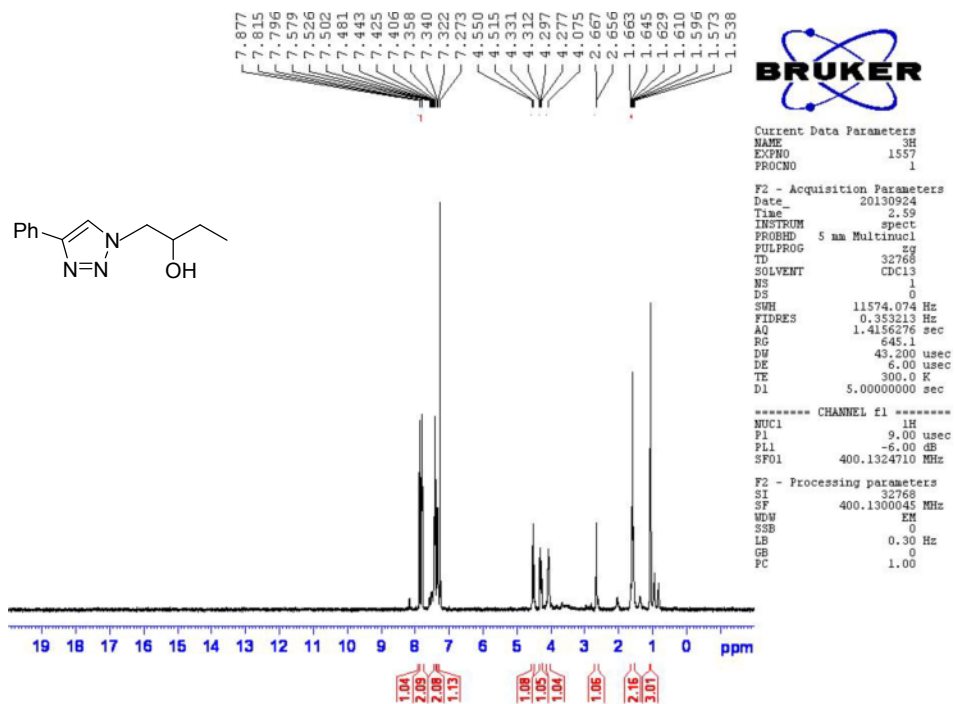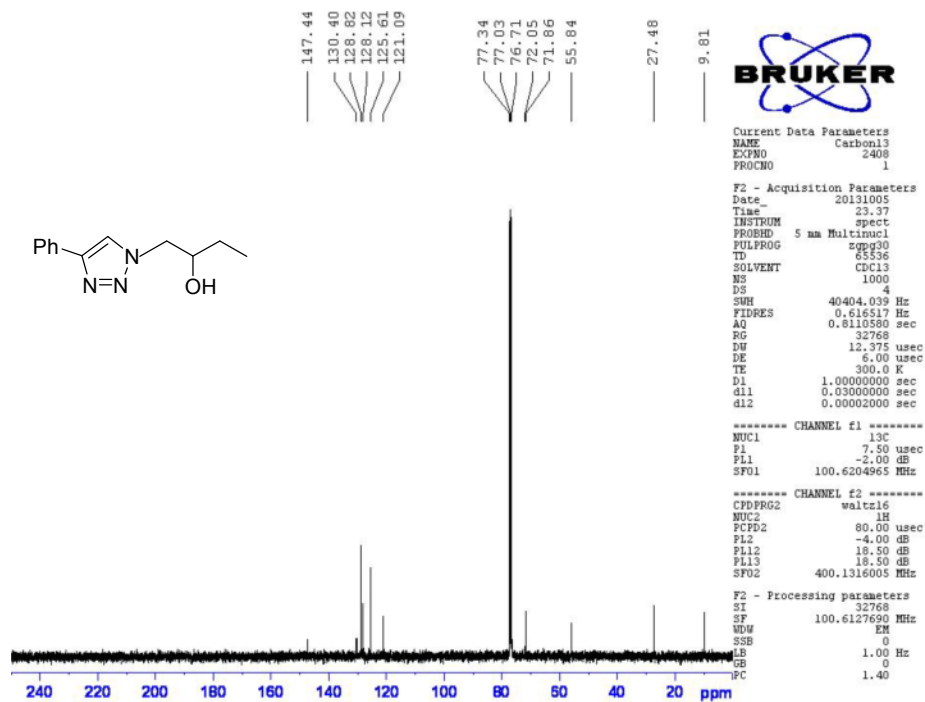

1-phenoxy-3-(4-phenyl-1H-1,2,3-triazol-1-yl)propan-2-ol (**3f**)

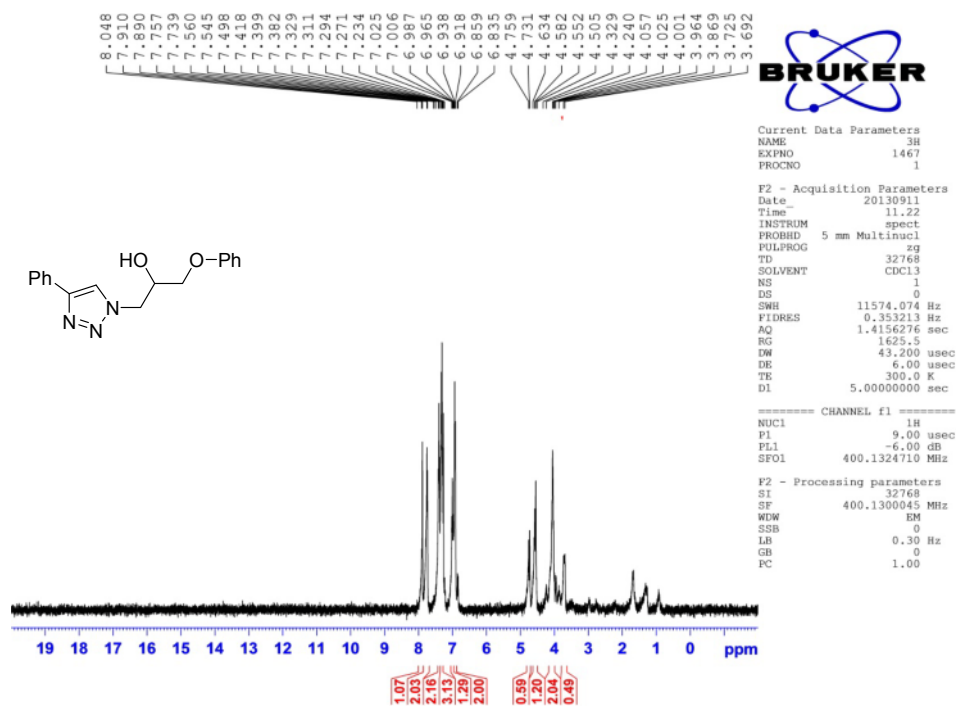

3-isopropoxy-2-(4-phenyl-1H-1,2,3-triazol-1-yl)propan-1-ol (**3g**).

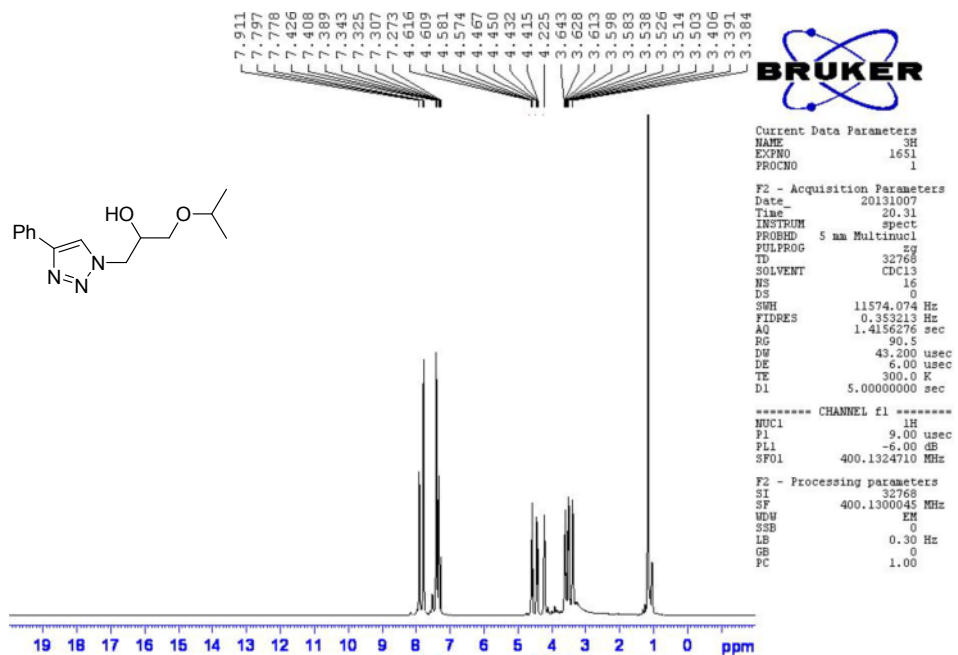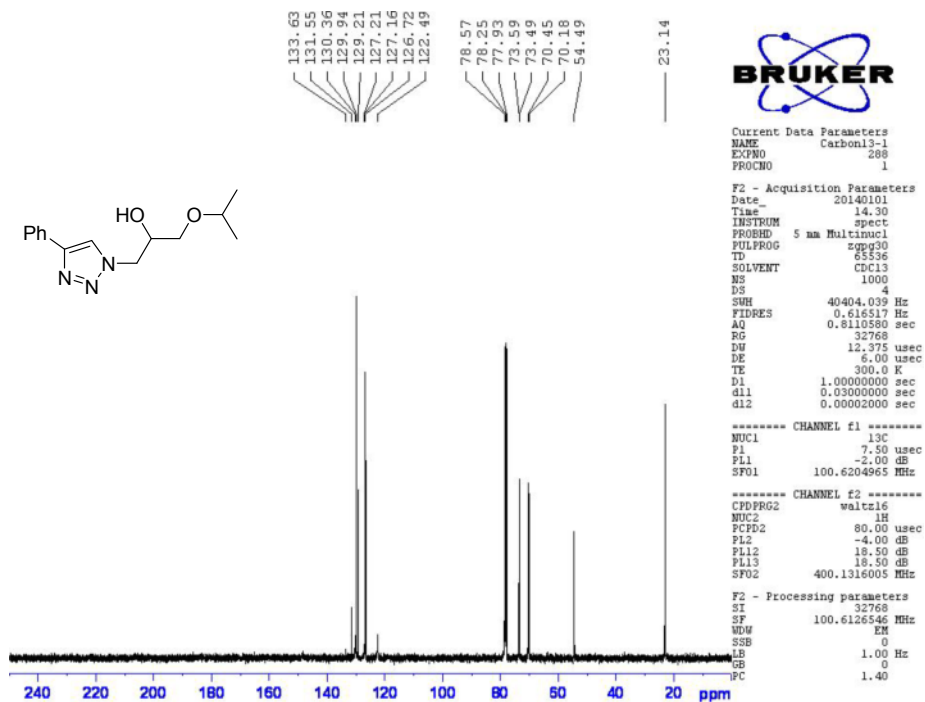

2-hydroxy-3-(4-phenyl-1H-1,2,3-triazol-1-yl)propyl acrylate (**3h**).

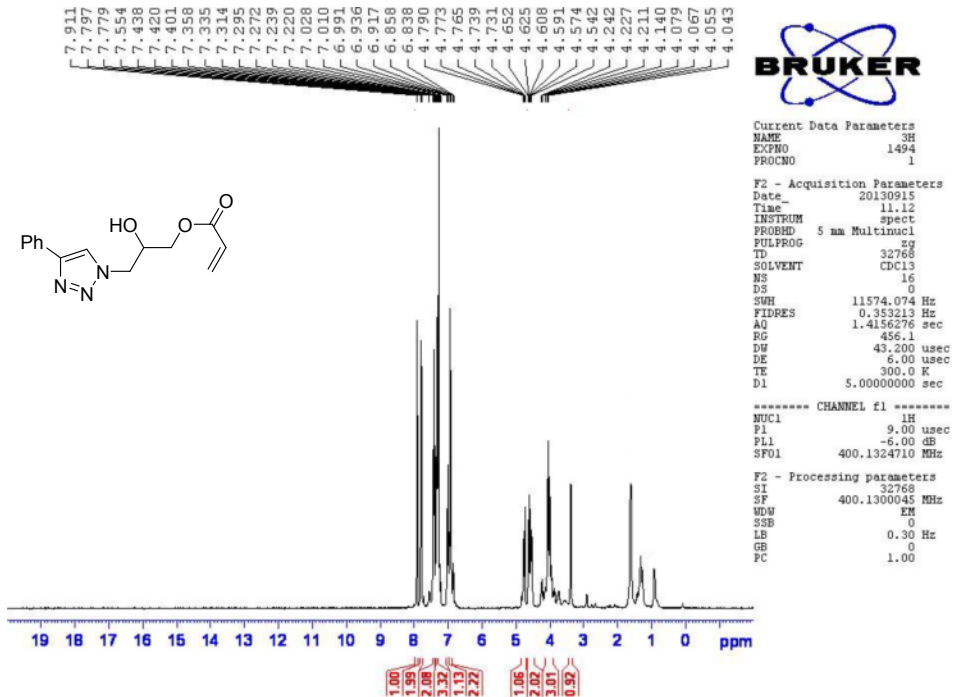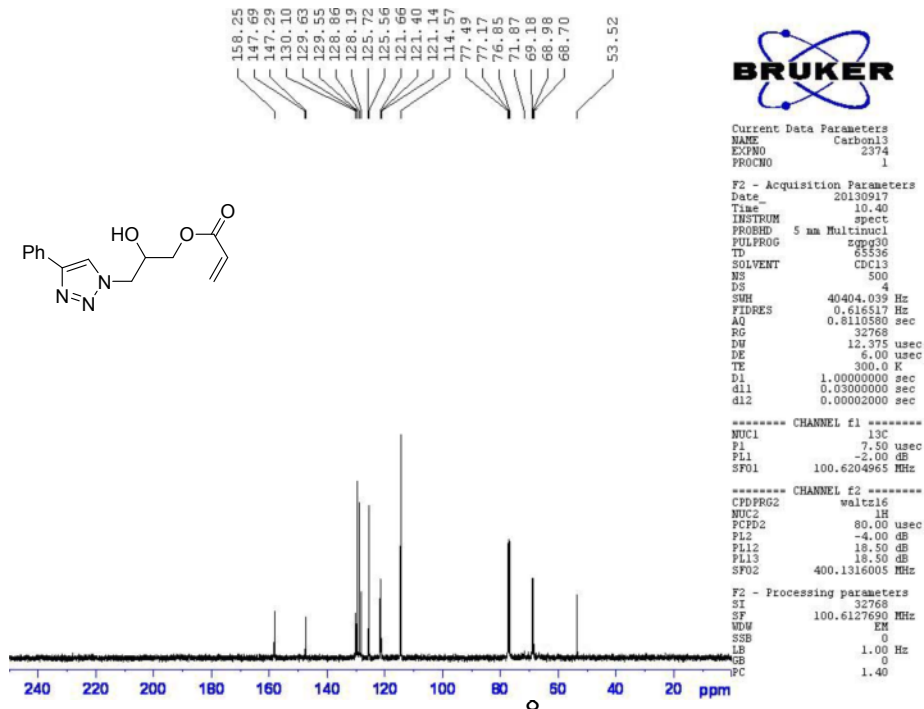



1,3-bis(5-phenyl-1H-1,2,3-triazol-1-yl) propan-2-ol (**3i**).

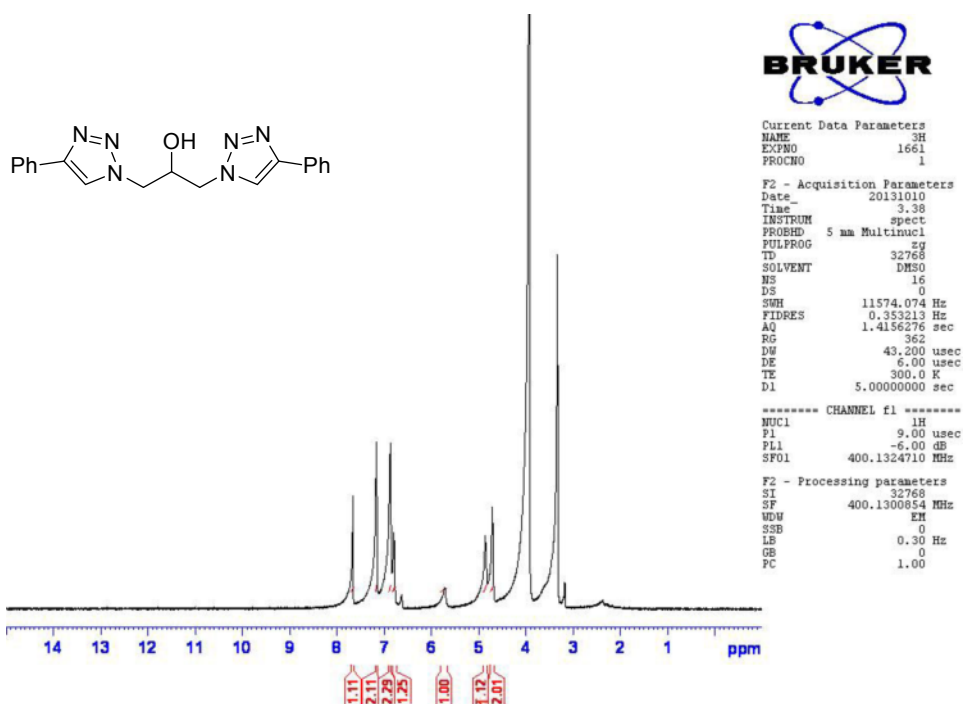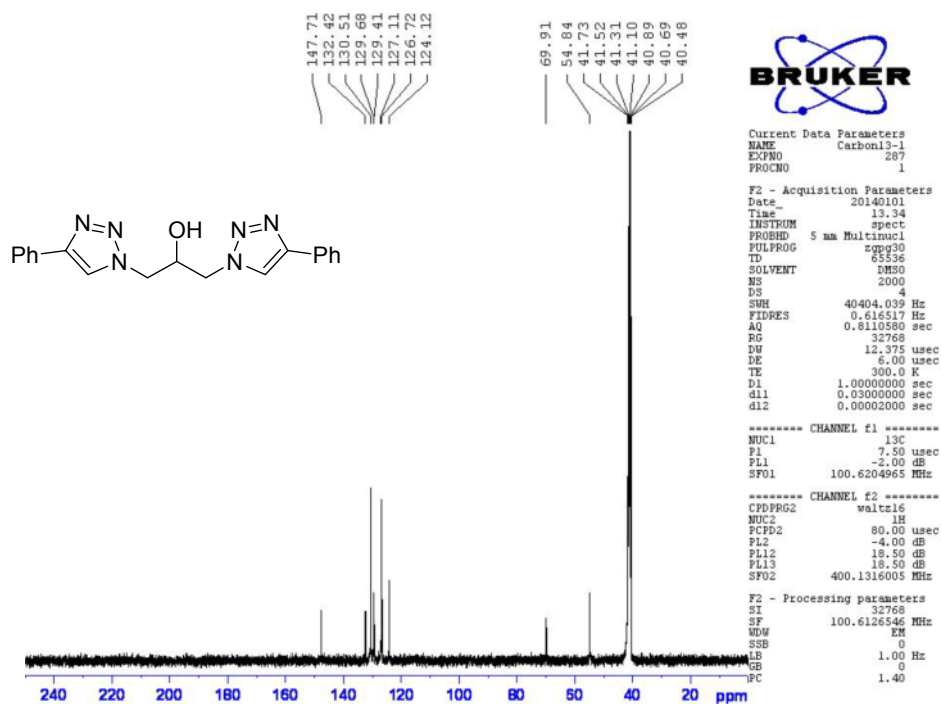

Supplement: c4ra17229a1.pdf [file c4ra17229a1.pdf]
